# Supplementary material for: Population genomics reveal distinct and diverging populations of An. minimus in Cambodia – a widespread malaria vector in Southeast Asia
Source: bioRxiv or medRxiv preprint supplement (doi:10.1101/2021.11.11.468219), 2021-12-16

Supplementary materials for

**Population genomics reveal distinct and diverging populations of *An. minimus* in Cambodia – a widespread malaria vector in Southeast Asia**

Brandyce St. Laurent, Nick Harding, Nick Deason, Kolthida Oy, Chea Sok Loeun, Men Sary, Rous Sunly, Sen Nhep, Eleanor Drury, Kirk Rockett, Siv Sovannaroth, Sonia Goncalves, Alistair Miles, Dominic Kwiatkowski

**Supplementary Figures:**

Supplementary Figure 1 - Nucleotide diversity across the largest 14 AminM1 contigs for four Cambodian populations

Supplementary Figure 2 - Watterson's Theta across the largest 14 AminM1 contigs for four Cambodian populations

Supplementary Figure 3 - Tajima's D across the largest 14 AminM1 contigs for four Cambodian populations

Supplementary Figure 4 - *An. minimus* Fst scan population comparisons

These tables include Fst scans in 1000 SNP windows across the largest 18 contigs for each of 6 population comparisons.

(S. Fig 4 is in a separate document - "Minimus Fst population comparison supplement.pdf")

**Supplementary Tables (supplementary\_tables\_min\_pop\_gen):**

**Supplementary Table 1 - sample metadata**

This table includes unique sample identifiers and collection metadata for each individual female mosquito included in this study.

**Supplementary Table 2 - IR SNP variants**

SNP variants occurring in over 2% in any within known insecticide-resistance associated genes Ace1, Rdl, KDR, and GSTe2, population are reported here.

**Supplementary Table 3 - population Fst**

Pariwise average Fst calculations in 20Kb windows for the four populations over the five largest contigs are reported.

**Supplementary Table 4 – Min contig locations**

Summary of largest 40 contigs used for diversity statistics and other calculations in this study, including which *Anopheles* genomic element and AgamP4 chromosome equivalent arm they lie on.

**Supplementary Table 5 – sampling summary**

A summary of timepoints and sites where individual *An. minimus* samples were collected.

Supplementary Figure 1 - Nucleotide diversity across the largest 14 AminM1 contigs for four Cambodian populations

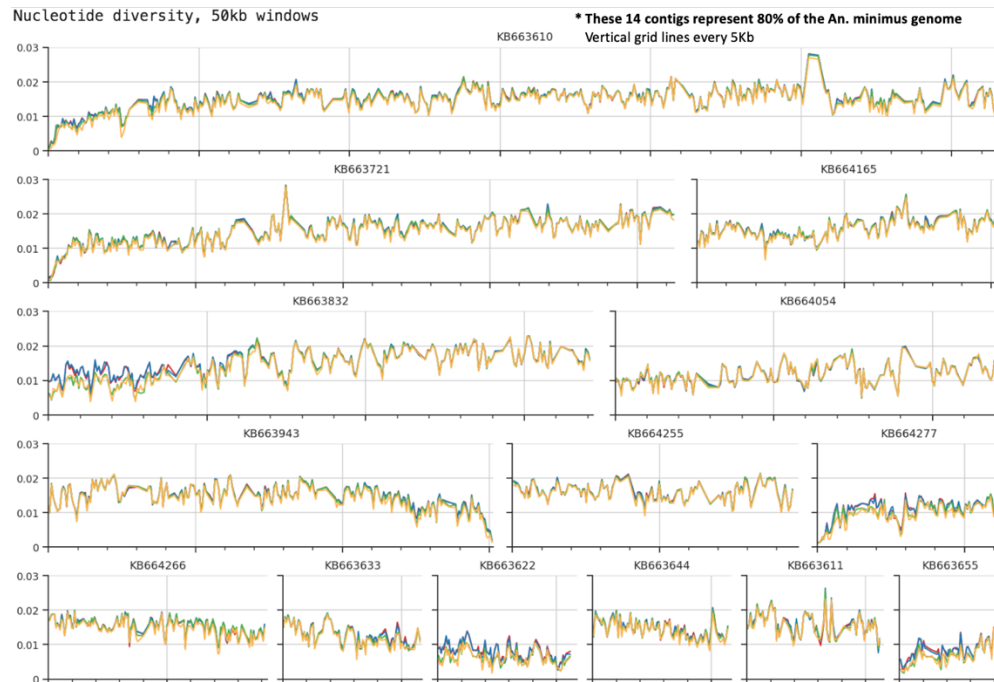

Supplementary Figure 2 - Watterson's Theta across the largest 14 AminM1 contigs for four Cambodian populations

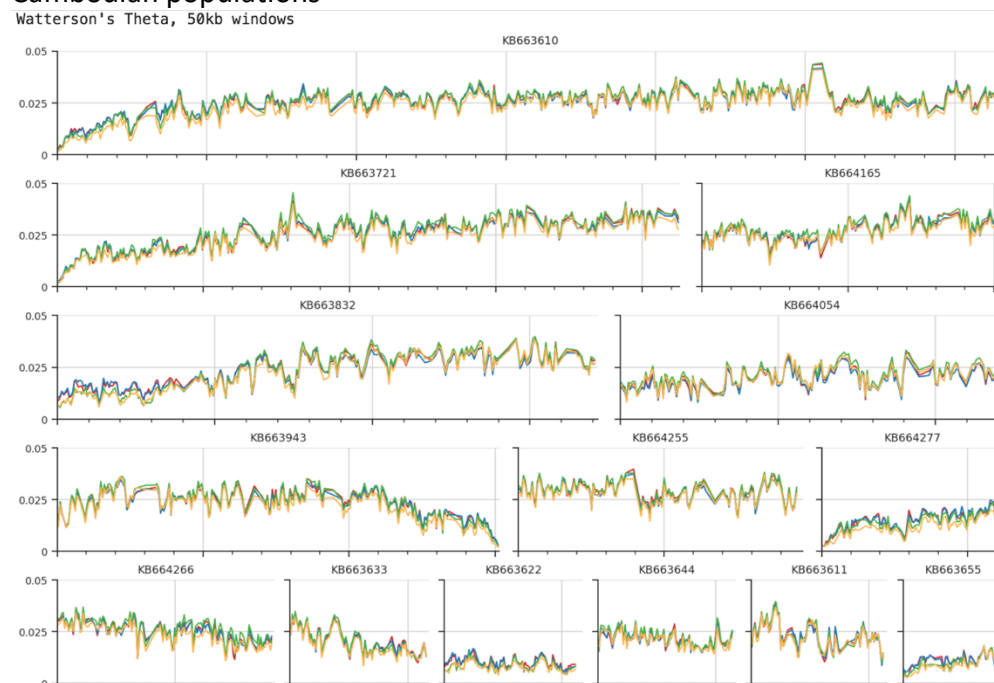

### Supplementary Figure 3 - Tajima's D across the largest 14 AminM1 contigs for four Cambodian populations

Tajima's D, 50kb windows

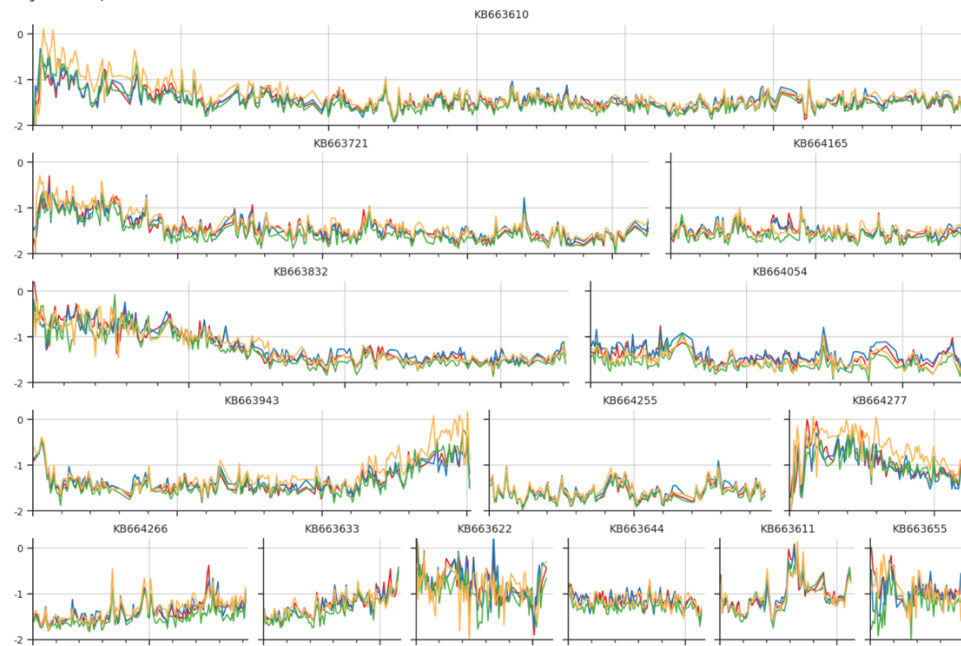

Supplement: Supplementary file [file media-1.pdf]
