# Supplementary material for: Population genomics reveal distinct and diverging populations of An. minimus in Cambodia – a widespread malaria vector in Southeast Asia
Source: bioRxiv or medRxiv preprint supplement (doi:10.1101/2021.11.11.468219), 2021-12-16

# TD vs. PV 1 vs. 2

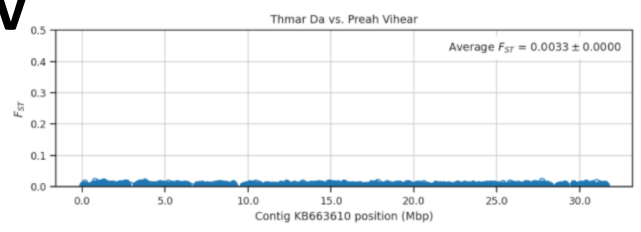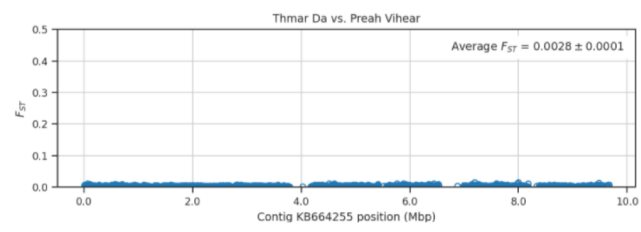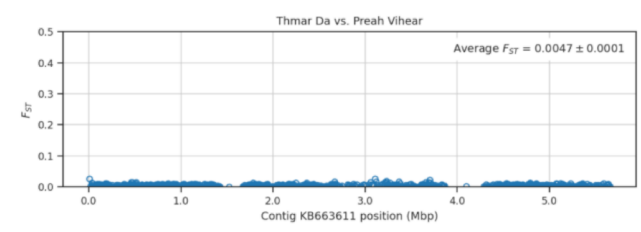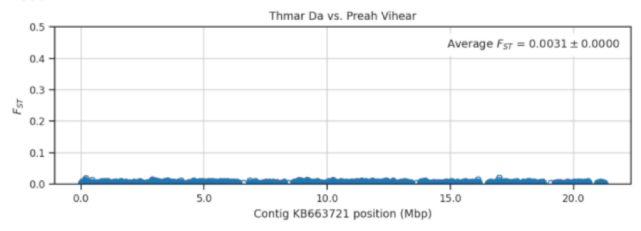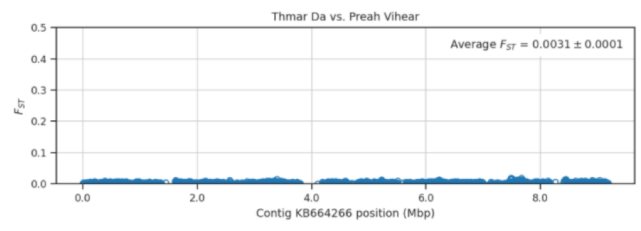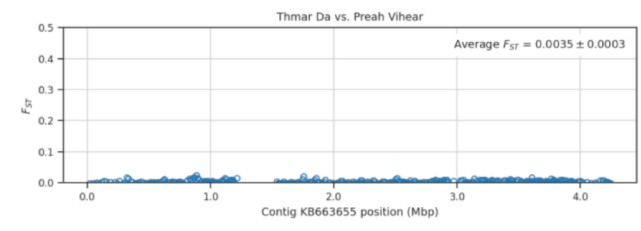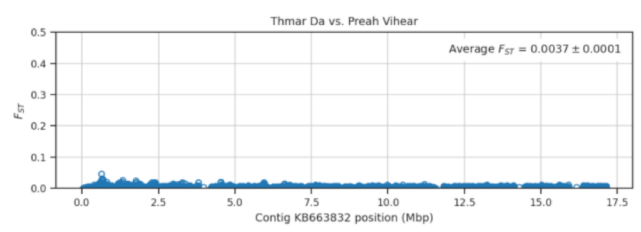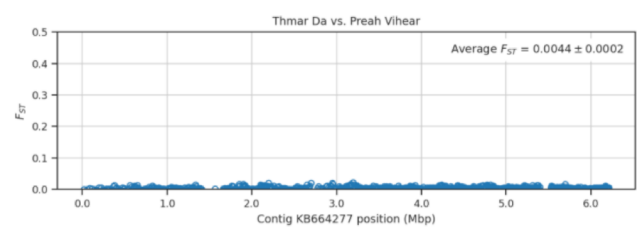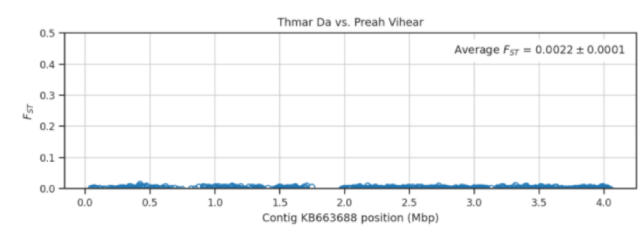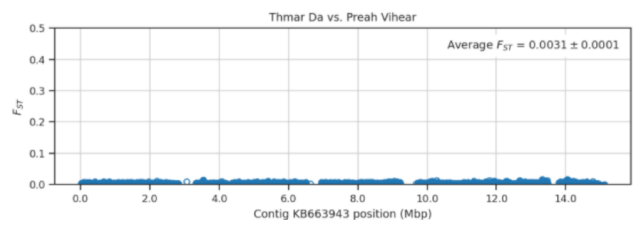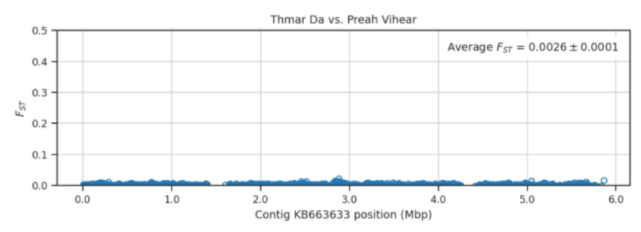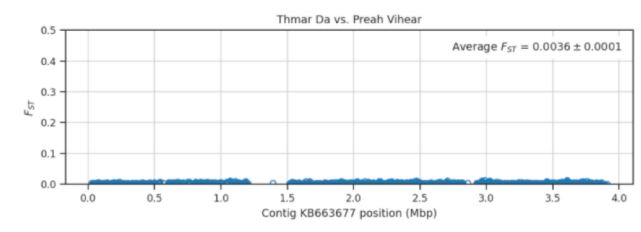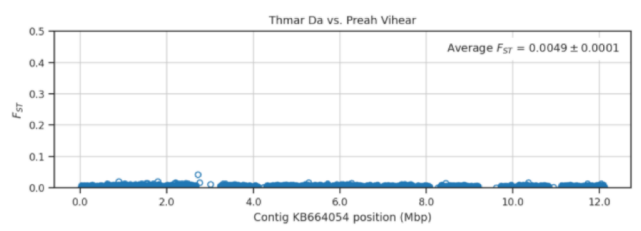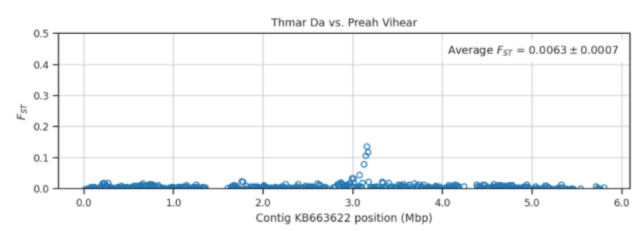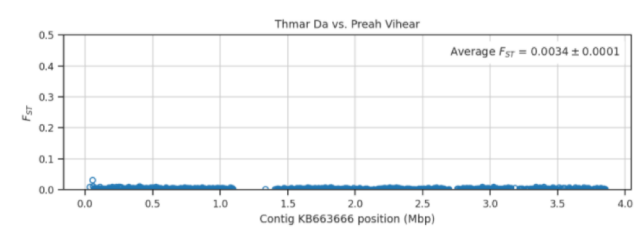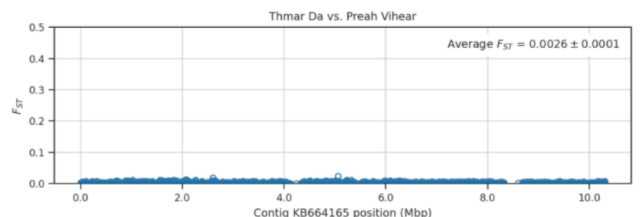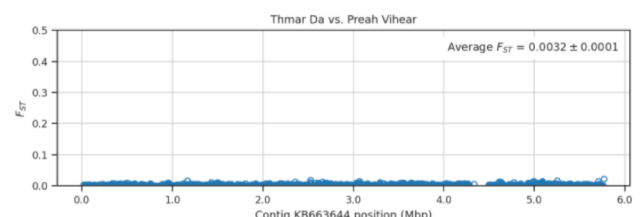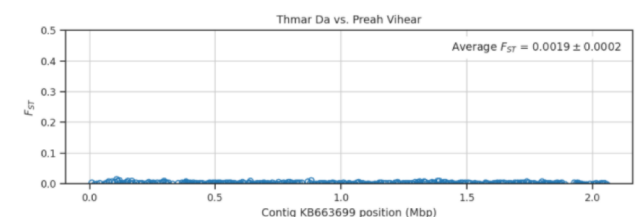

# TD vs. RK1 1 vs. 3

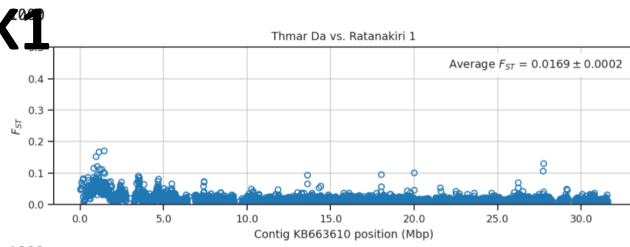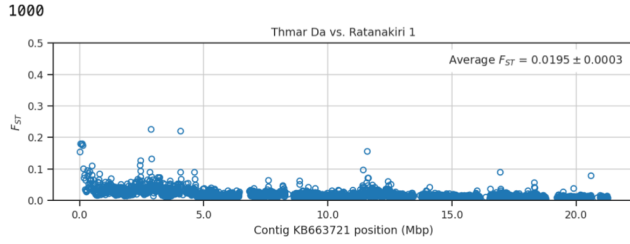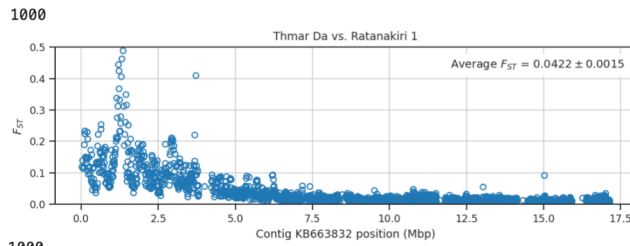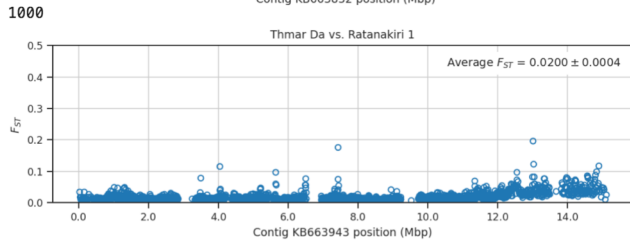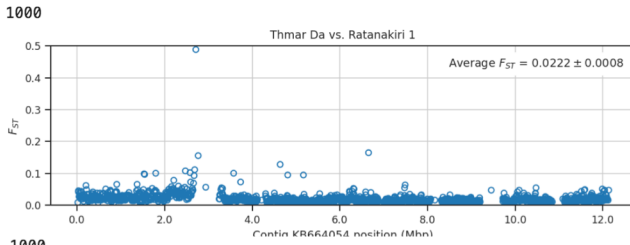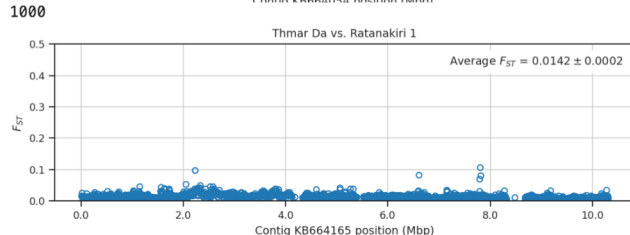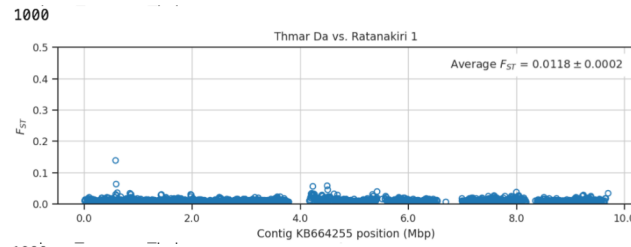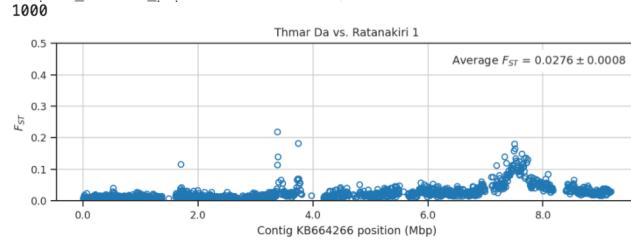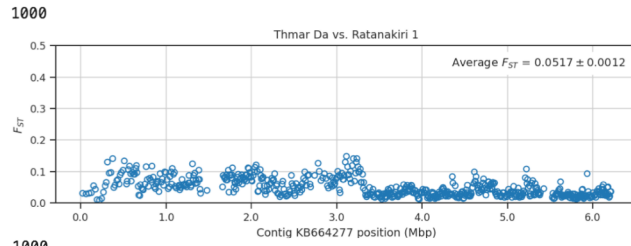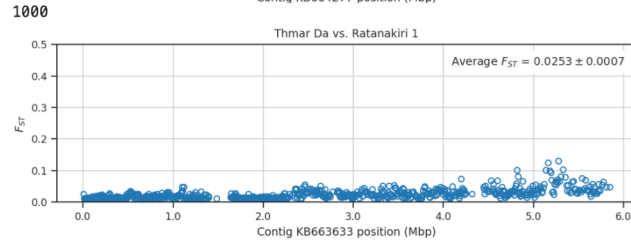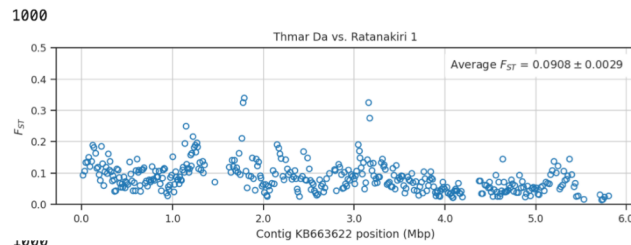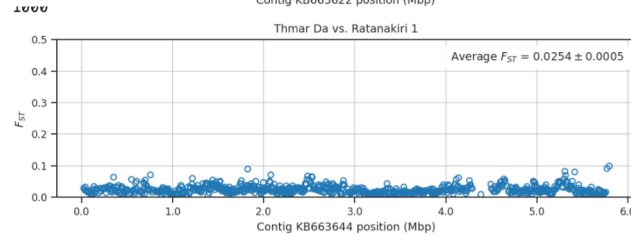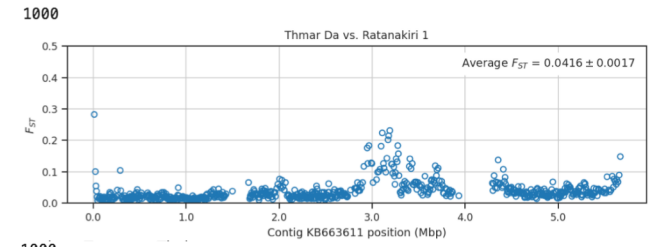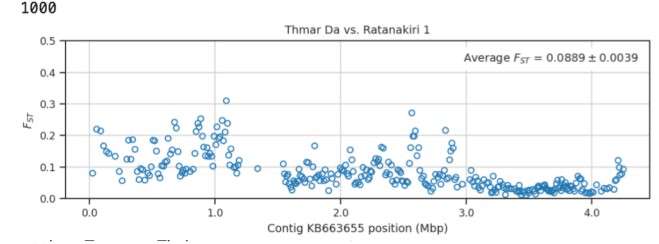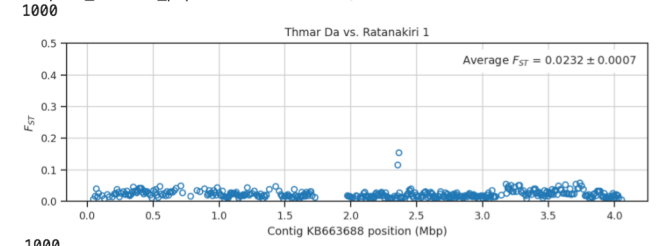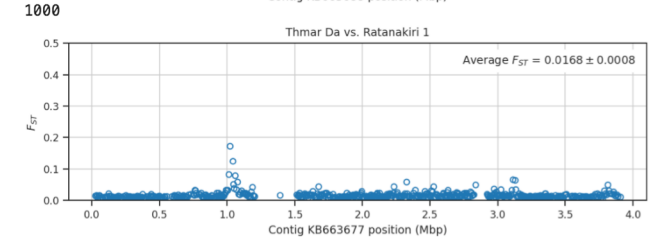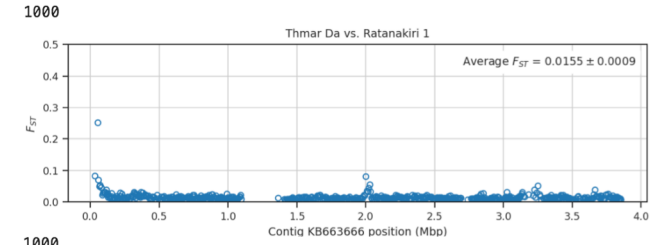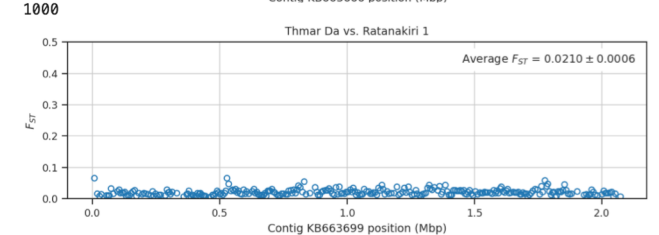

# TD vs. RK2

## 1 vs. 4

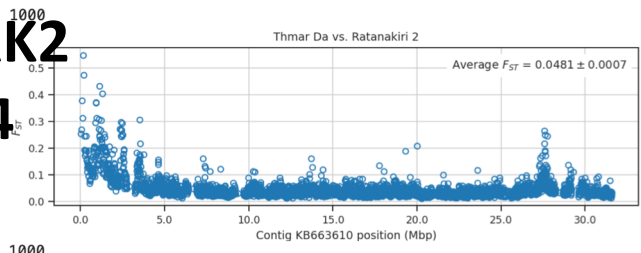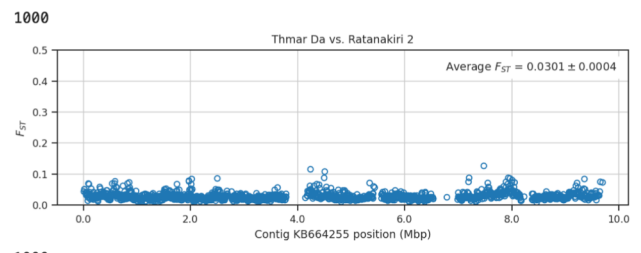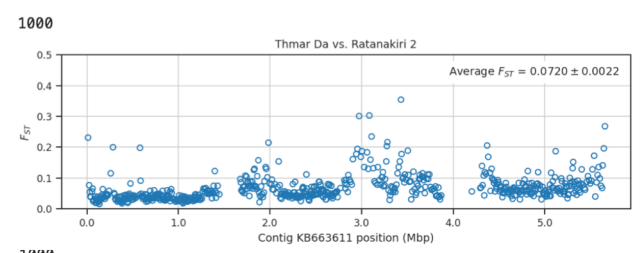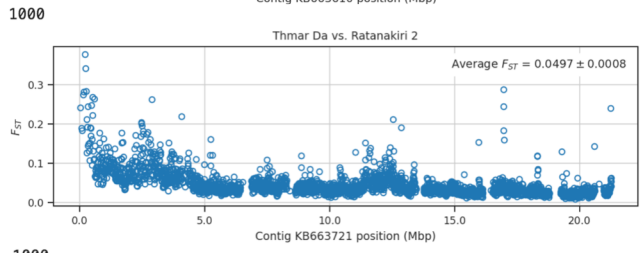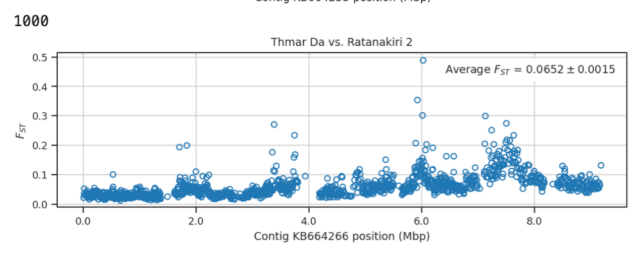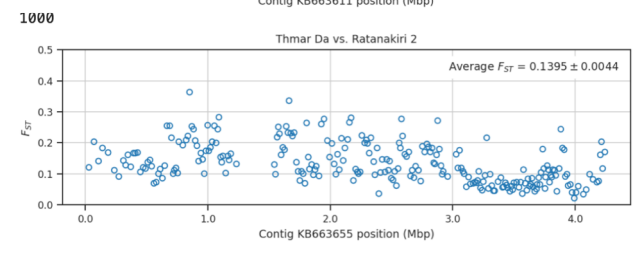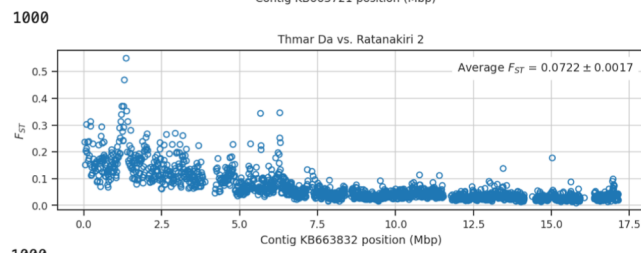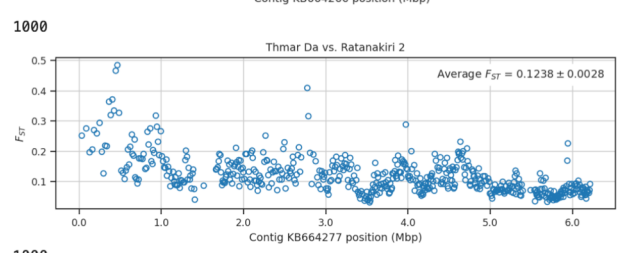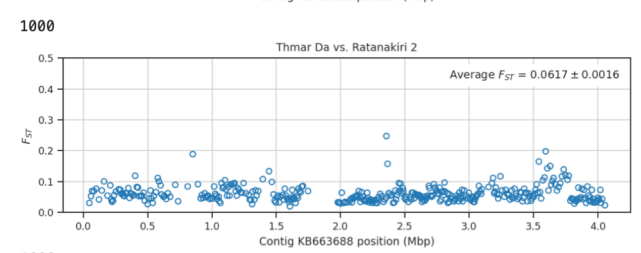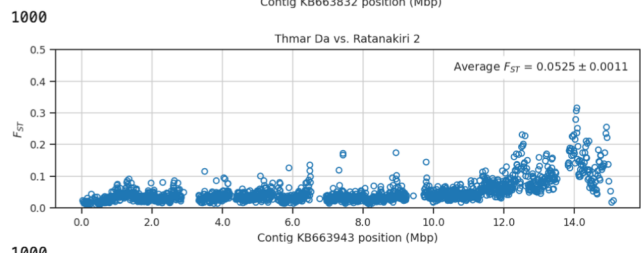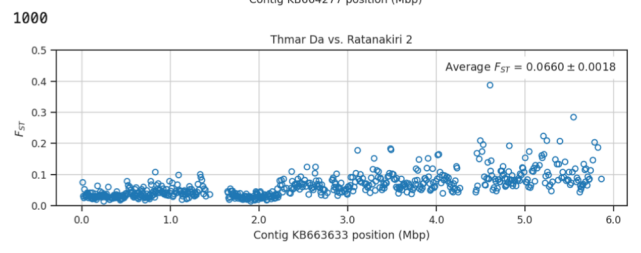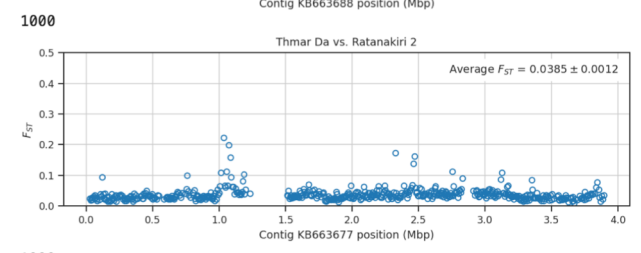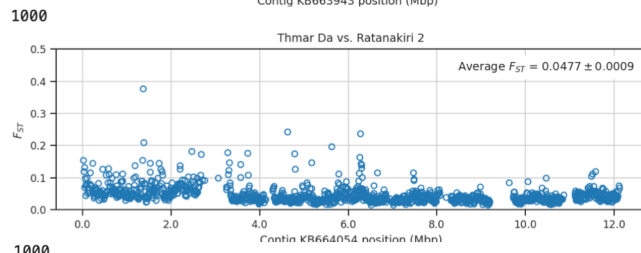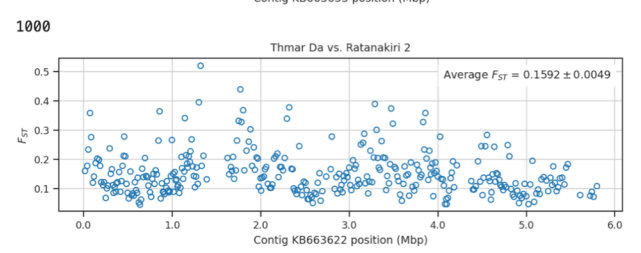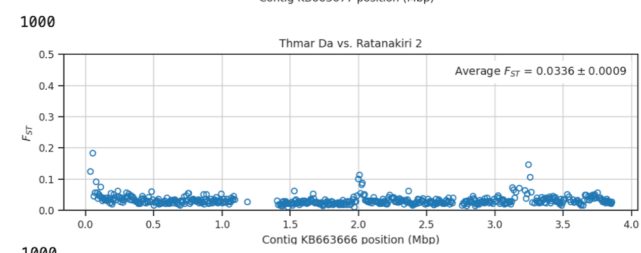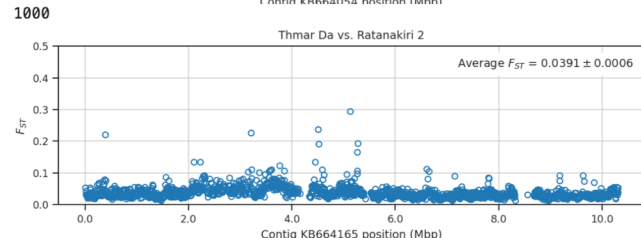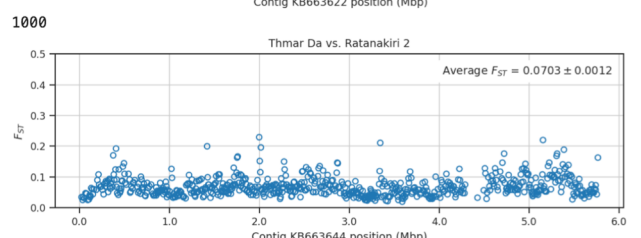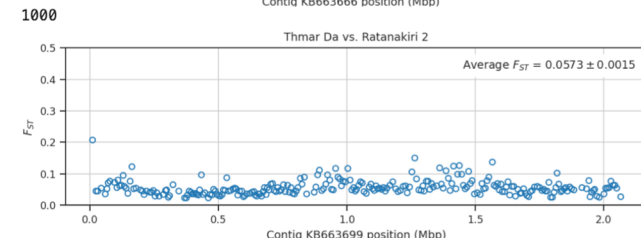

# PV vs. RK1 2 vs. 3

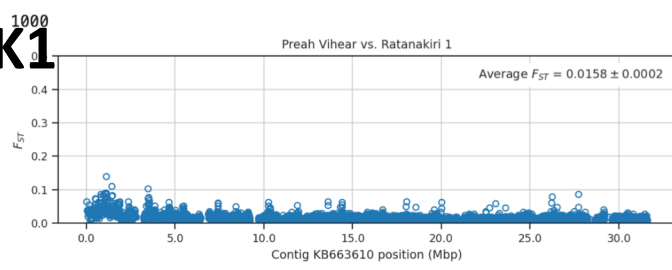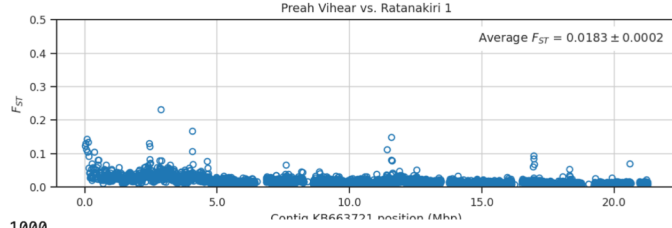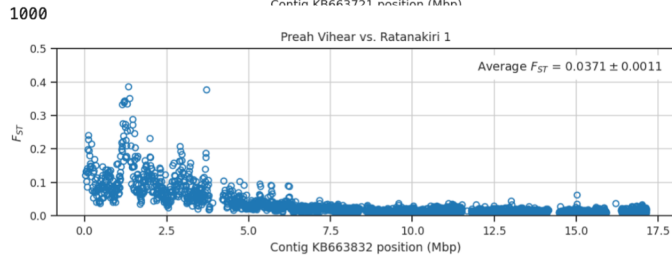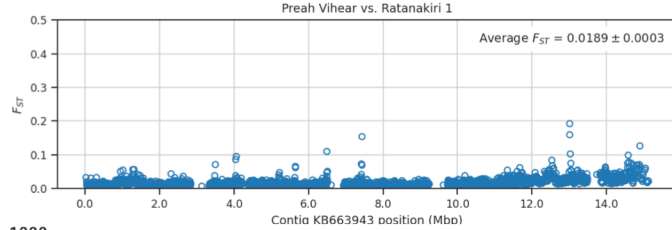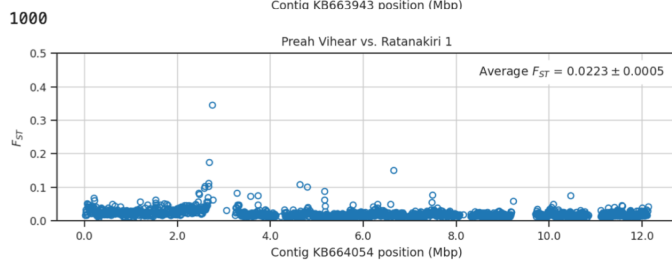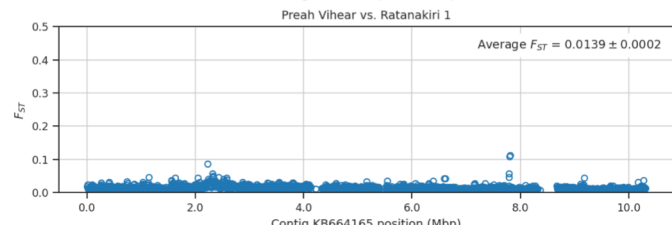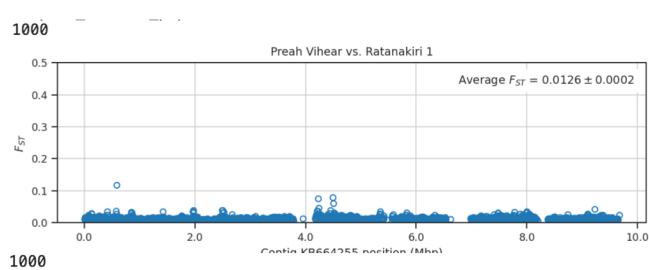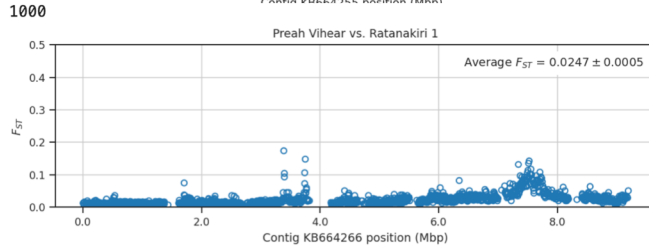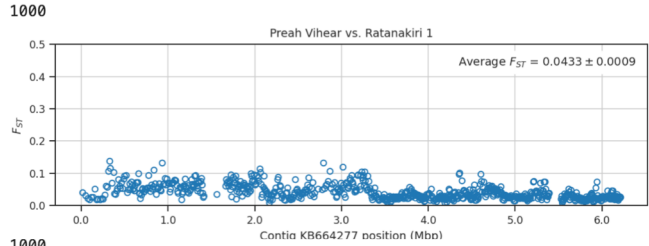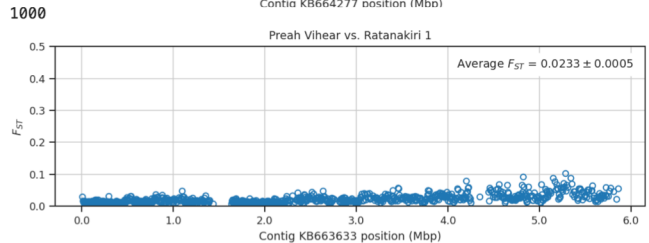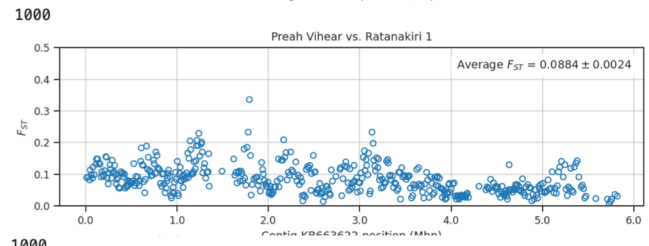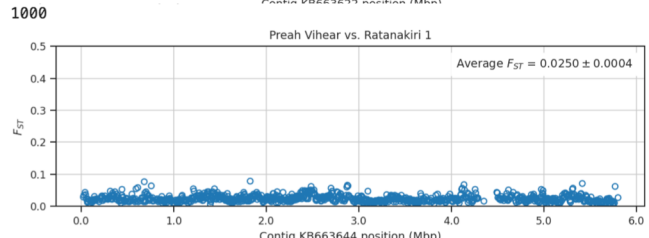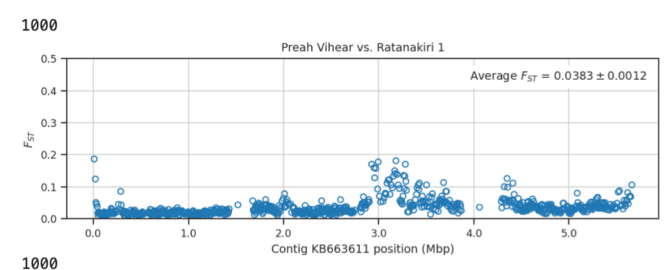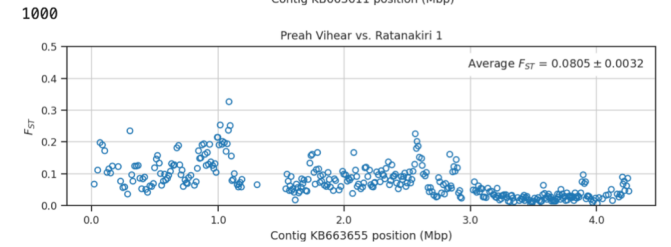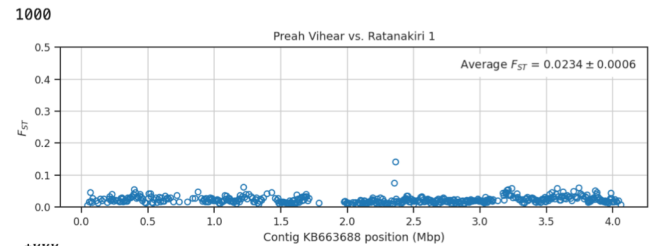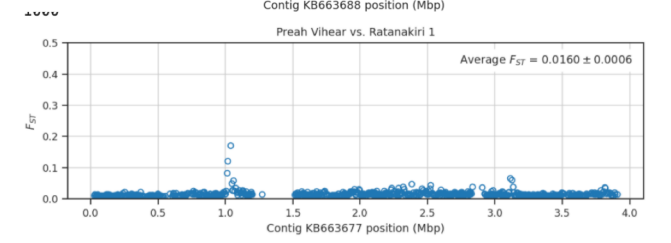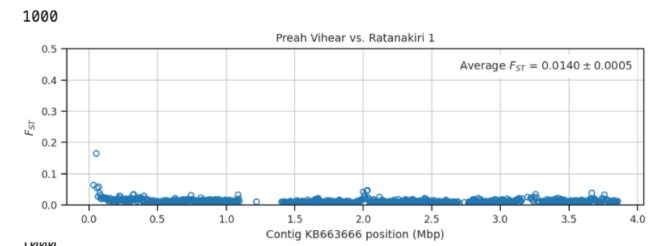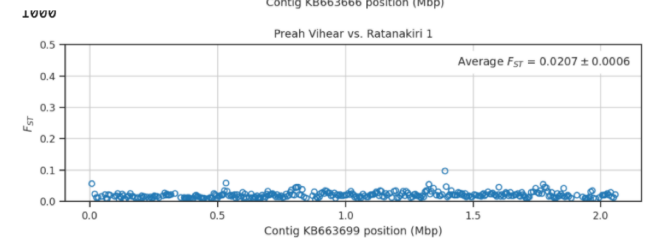

# PV vs. RK2

## 2 vs. 4

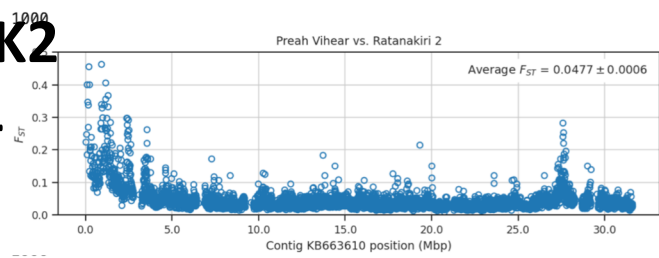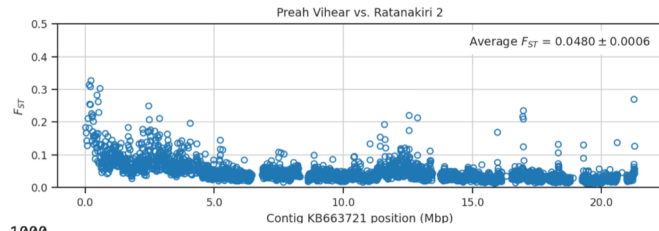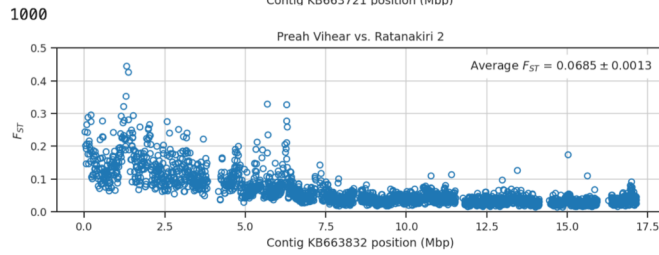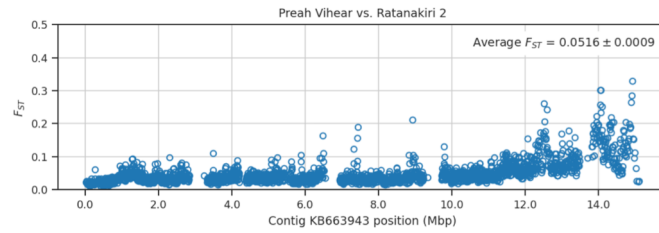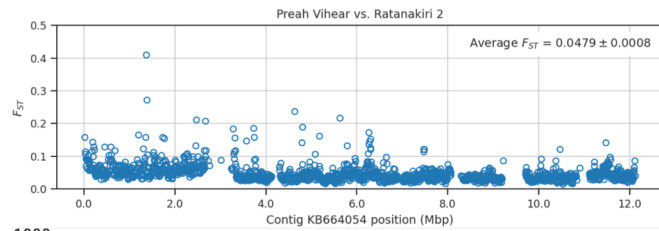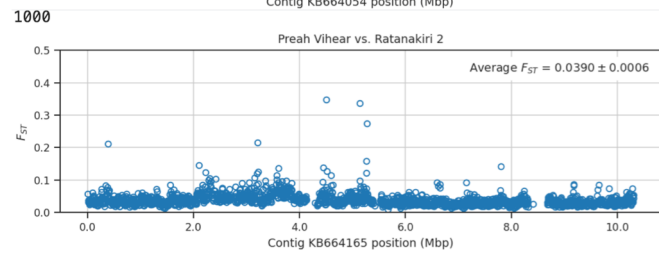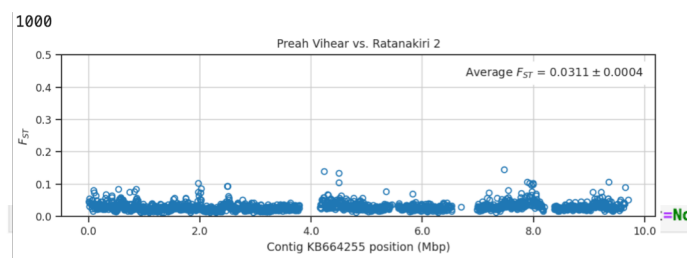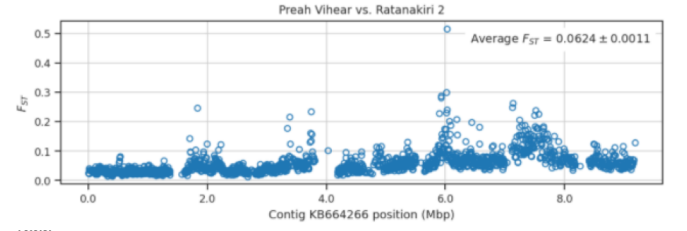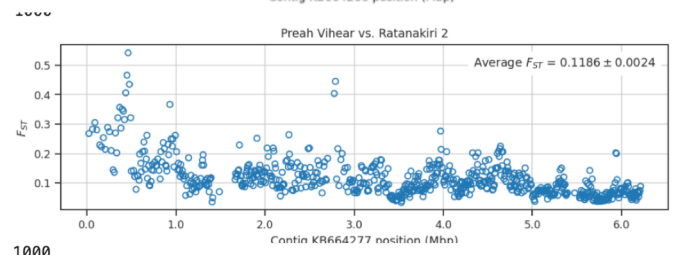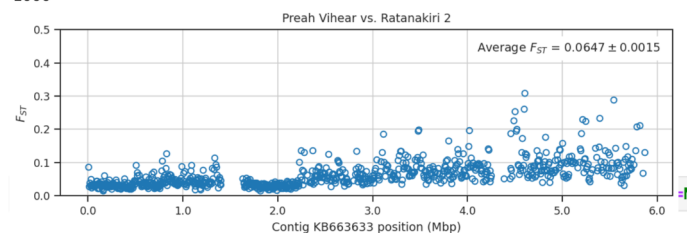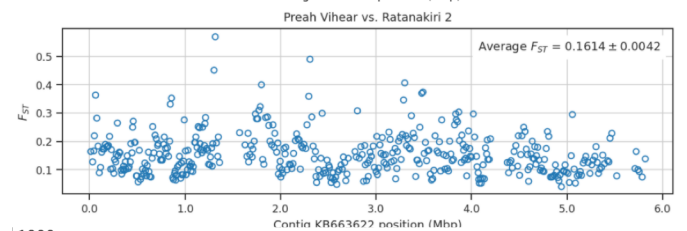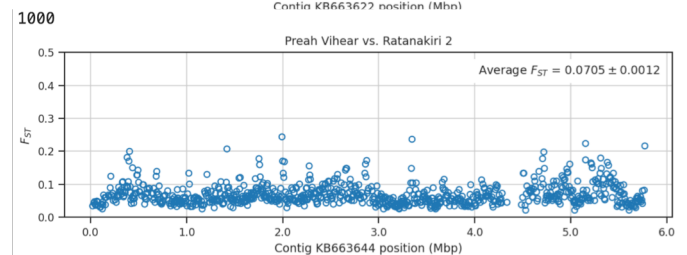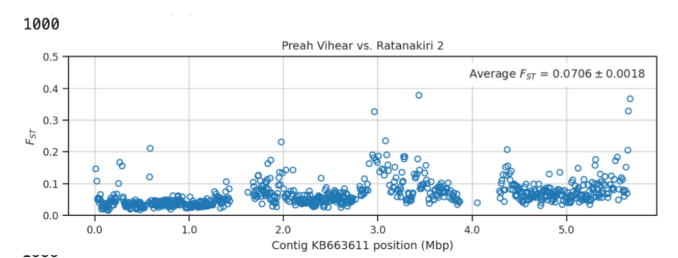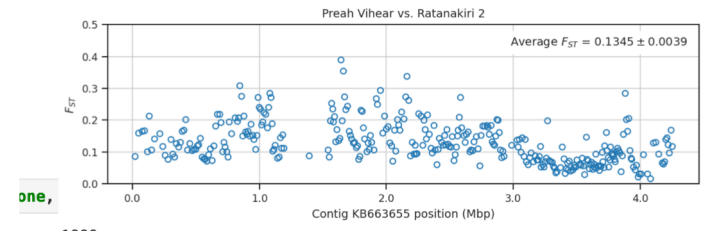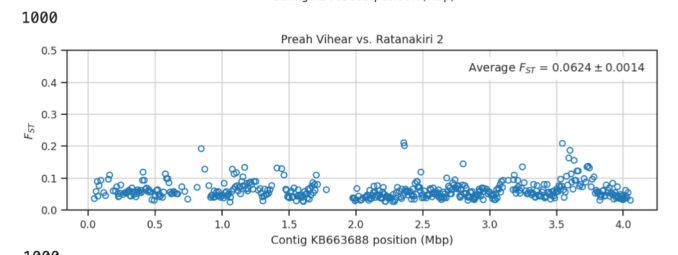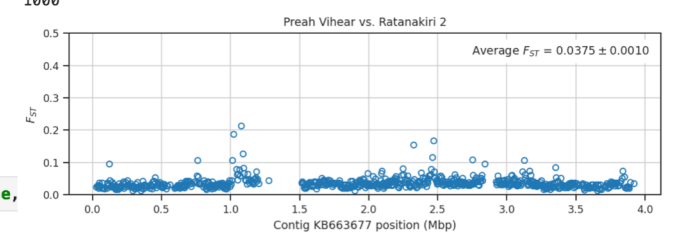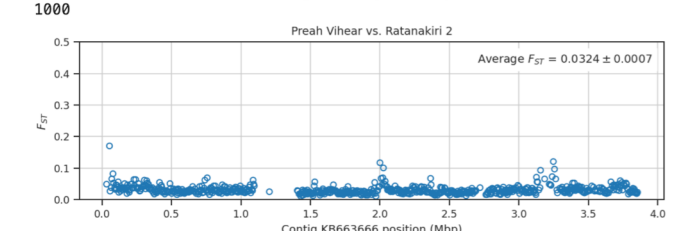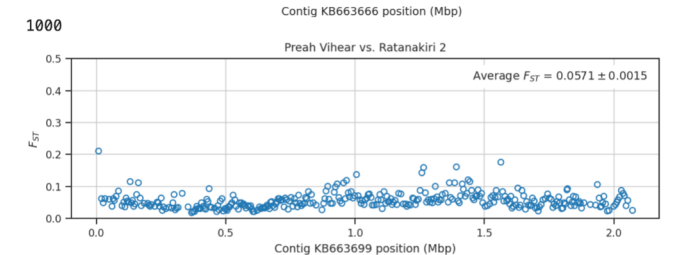

# RK1 vs. RK2

## 3 vs. 4

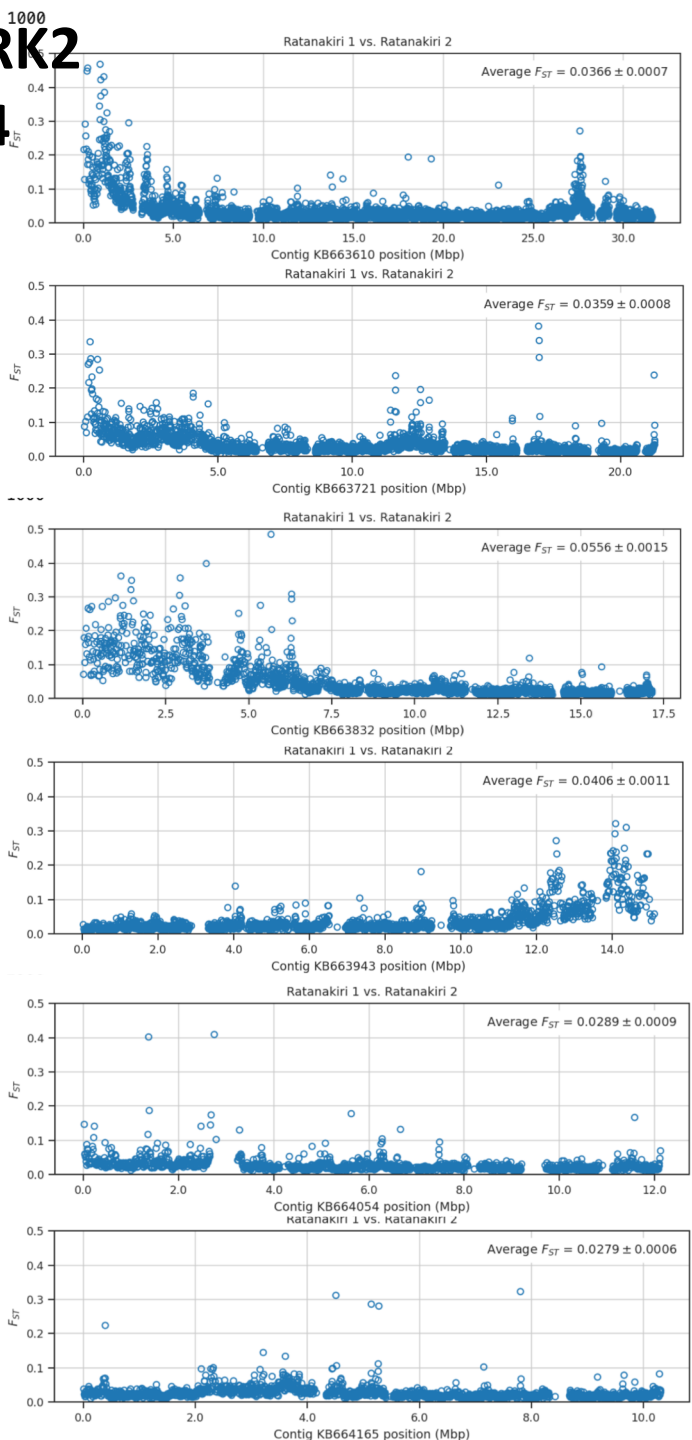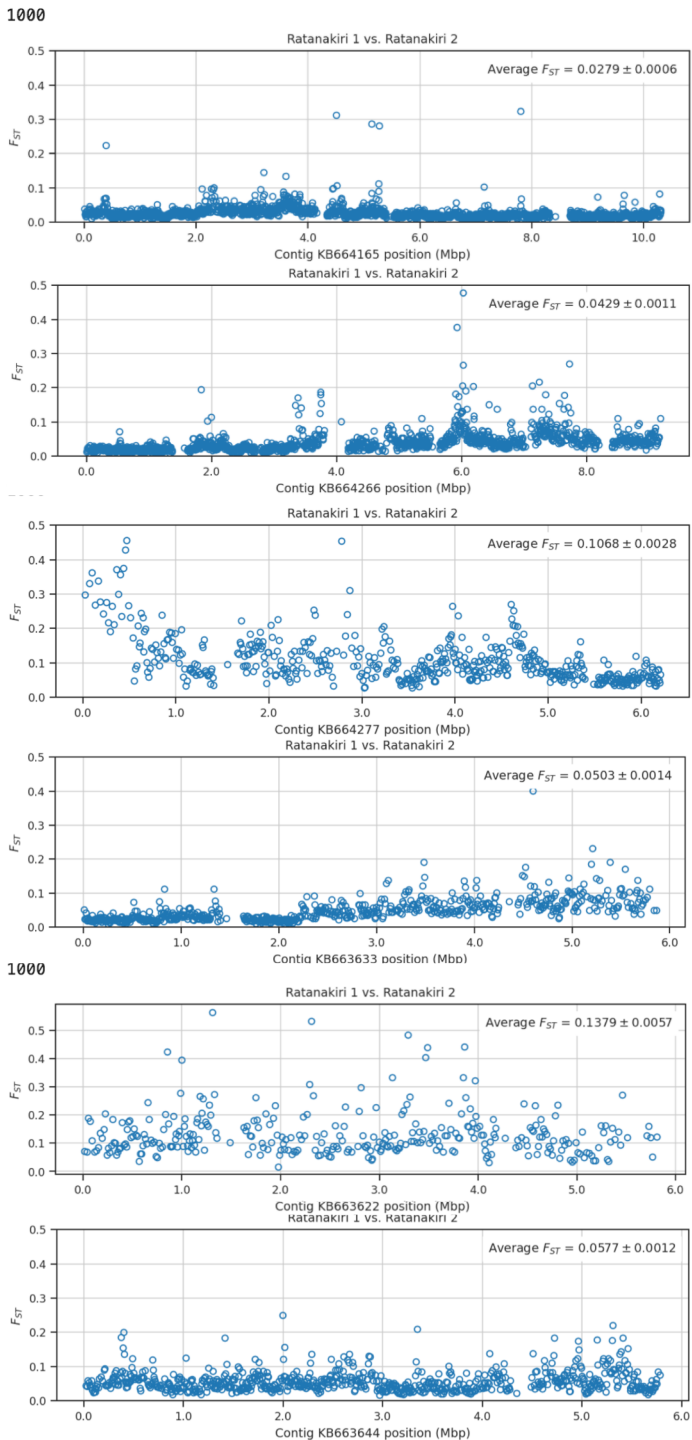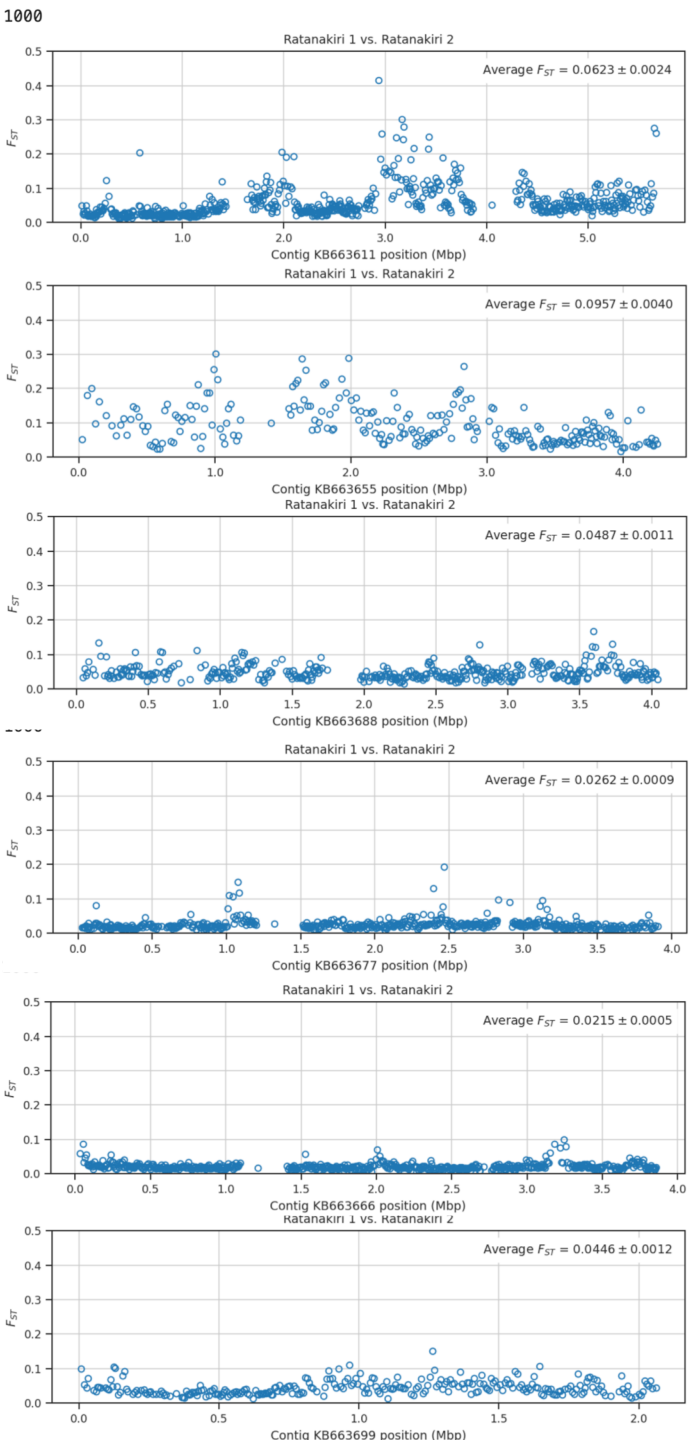

Supplement: Supplementary file [file media-3.pdf]
